# Supplementary material for: Immune subtypes and diagnostic genes revealed by neutrophil trap-associated transcriptomic signatures in ischemic stroke
Source: Research Square preprint supplement (doi:10.21203/rs.3.rs-7515929/v1), 2025-10-22
Supplement: Supplementary file 1 [file cb9cd9349d1057d85d375535.docx]

Supplementary Material

# Supplementary Tables

## Supplementary Table 1. Gene expression profiles associated with ischemic stroke were retrieved from GEO.

| Group | Training dataset | | | | Test dataset | | | |
| --- | --- | --- | --- | --- | --- | --- | --- | --- |
| Dataset | GSE16561 | | GSE58294 | | GSE195442 | | GSE66724 | |
| Platform | GPL6883 | | GPL570 | | GPL31275 | | GPL570 | |
| Groups | Control | IS | Control | IS | Control | IS | Control | IS |
| Number | 24 | 39 | 23 | 69 | 10 | 10 | 8 | 8 |

## Supplementary Table 2. NETs-related genes integrated from published literature.

| literature | Number of NETs-related genes | Total |
| --- | --- | --- |
| Wang(1) | 24 | 241 |
| Shi(2) | 149 |
| Zhang(3) | 68 |

## Supplementary Table 3. Robust diagnostic biomarkers identified through machine learning algorithms.

| Algorithms | Genes | Number |
| --- | --- | --- |
| LASSO | *SLC22A4, KCNJ15, ARG1, ABCA1, CLEC4E, VNN3, ANXA1, MMP9, FCGR1A, PGLYRP1, TCN1, SIGLEC5, SLPI, CRISPLD2, IL18R1, CAMP* | 16 |
| SVM-RFE | *CLEC4E, KCNJ15, ANXA1, IL18R1, ABCA1, ARG1, PGLYRP1, CAMP, MMP9, FCGR1A, VNN3, F5, CRISPLD2* | 13 |
| RF | *ANXA1, ABCA1, SLC22A4, ARG1, MMP9, CLEC4E, KCNJ15, F5* | 8 |

## Supplementary Table 4. Subtype classification of ischemic stroke samples based on consensus clustering of intersecting hub genes.

| ID | *KCNJ15* | *ARG1* | *ABCA1* | *CLEC4E* | *ANXA1* | *MMP9* | Cluster |
| --- | --- | --- | --- | --- | --- | --- | --- |
| GSE16561_GSM416528_IS | 1.007489 | -1.13403 | -1.64923 | 1.476526 | 0.642095 | 2.098725 | C1 |
| GSE16561_GSM416529_IS | 1.174992 | 0.063572 | -1.00683 | 1.757115 | -0.17338 | 2.844359 | C2 |
| GSE16561_GSM416530_IS | 1.091384 | -0.98652 | -1.06589 | 1.646242 | -0.41874 | 2.563603 | C1 |
| GSE16561_GSM416531_IS | 2.026447 | 0.051569 | -0.35792 | 1.413059 | -0.67036 | 3.272087 | C2 |
| GSE16561_GSM416532_IS | 1.868445 | -0.02985 | -1.14089 | 2.156803 | 0.043037 | 2.179423 | C1 |
| GSE16561_GSM416533_IS | 1.33661 | -0.63357 | -0.84184 | 0.860473 | 0.262118 | 1.529463 | C1 |
| GSE16561_GSM416534_IS | 1.294691 | -1.33064 | -1.63771 | 1.999854 | 0.576869 | 1.161688 | C1 |
| GSE16561_GSM416535_IS | 2.143675 | 1.407794 | -0.42149 | 2.234762 | 0.191619 | 2.495453 | C2 |
| GSE16561_GSM416536_IS | 0.940026 | -1.45999 | -0.92013 | 1.197545 | 0.570901 | 0.287691 | C1 |
| GSE16561_GSM416537_IS | 1.302238 | -0.22001 | -1.11554 | 1.388541 | -0.15428 | 1.912982 | C1 |
| GSE16561_GSM416538_IS | 1.244376 | -1.04202 | -0.70875 | 1.651923 | -0.43742 | 2.514185 | C1 |
| GSE16561_GSM416539_IS | 1.835734 | 1.259661 | 0.446279 | 2.126525 | 0.418946 | 2.790974 | C2 |
| GSE16561_GSM416540_IS | 0.893403 | -0.11947 | -0.79548 | 2.299711 | 0.107734 | 0.514729 | C1 |
| GSE16561_GSM416541_IS | 1.837752 | 0.01362 | -0.45386 | 2.101716 | 0.315585 | 2.569502 | C2 |
| GSE16561_GSM416542_IS | 1.573109 | -0.18815 | -0.56218 | 1.630118 | 0.08525 | 2.166896 | C1 |
| GSE16561_GSM416543_IS | 1.225271 | -0.89336 | -1.37418 | 1.355288 | 0.003927 | 1.372482 | C1 |
| GSE16561_GSM416544_IS | 1.387923 | 0.113638 | -0.7638 | 2.219993 | 0.518352 | 2.20969 | C1 |
| GSE16561_GSM416545_IS | 1.624196 | 0.153009 | 0.059038 | 1.915855 | -0.44081 | 0.639655 | C1 |
| GSE16561_GSM416546_IS | 1.931052 | -0.65158 | -0.46779 | 1.655946 | 0.044419 | 1.305154 | C1 |
| GSE16561_GSM416547_IS | 1.467154 | -0.86568 | -1.62022 | 2.029136 | 0.48622 | 2.331197 | C1 |
| GSE16561_GSM416548_IS | 0.771928 | 0.376546 | -1.90574 | 1.774989 | 0.987186 | 2.148192 | C1 |
| GSE16561_GSM416549_IS | 1.282456 | -0.85541 | 0.077689 | 2.250541 | 0.301642 | 2.025482 | C1 |
| GSE16561_GSM416550_IS | 1.88578 | 1.407794 | -0.14853 | 2.7313 | -0.28338 | 4.619724 | C2 |
| GSE16561_GSM416551_IS | 1.899576 | -0.1818 | -0.13185 | 2.021465 | -0.13661 | 3.606074 | C2 |
| GSE16561_GSM416552_IS | 0.94661 | -1.68205 | -1.00752 | 1.767032 | 1.212893 | 1.690513 | C1 |
| GSE16561_GSM416553_IS | 1.85087 | 0.311294 | 0.272562 | 2.556095 | 0.832063 | 3.130599 | C2 |
| GSE16561_GSM416554_IS | 1.679938 | 2.878903 | -0.53909 | 3.193902 | 0.258792 | 3.937065 | C2 |
| GSE16561_GSM416555_IS | 1.34415 | 1.407794 | -0.88749 | 2.83618 | -0.18894 | 2.844359 | C2 |
| GSE16561_GSM416556_IS | 2.055298 | 0.266735 | -0.21575 | 1.733069 | -0.83487 | 0.250499 | C1 |
| GSE16561_GSM416557_IS | 1.673593 | 0.204265 | 0.004982 | 1.117201 | 0.410324 | 2.690311 | C2 |
| GSE16561_GSM416558_IS | 2.37648 | 0.952245 | -0.38609 | 2.575142 | -0.28254 | 3.780748 | C2 |
| GSE16561_GSM416559_IS | 1.917528 | 0.362447 | 0.299762 | 2.176038 | 0.125129 | 3.272087 | C2 |
| GSE16561_GSM416560_IS | 2.807232 | 2.878903 | -1.02797 | 2.473422 | 0.690289 | 2.877101 | C2 |
| GSE16561_GSM416561_IS | 2.438586 | -0.00871 | -1.27336 | 2.514805 | 0.035737 | 0.867349 | C1 |
| GSE16561_GSM416562_IS | 1.813732 | 0.46429 | -0.80053 | 1.783421 | 0.367061 | 2.412081 | C2 |
| GSE16561_GSM416563_IS | 2.802261 | 0.415294 | 0.847107 | 1.676939 | -0.16818 | 1.426982 | C2 |
| GSE16561_GSM416564_IS | 2.275508 | 1.335294 | 0.162954 | 3.881913 | -0.55318 | 3.397092 | C2 |
| GSE16561_GSM416565_IS | 1.502732 | 1.053759 | -0.42601 | 2.755508 | 0.465798 | 3.14479 | C2 |
| GSE16561_GSM416566_IS | 0.651753 | 0.593573 | -1.71548 | 2.049894 | 0.896435 | 1.636641 | C1 |
| GSE58294_GSM1406056_IS | 1.302099 | -0.23242 | -0.82773 | 1.927002 | 0.258912 | 1.939829 | C1 |
| GSE58294_GSM1406057_IS | 0.991261 | 0.146424 | -1.48933 | 1.197817 | 0.711225 | 1.070554 | C1 |
| GSE58294_GSM1406058_IS | 1.598843 | -0.84392 | -0.62983 | 1.852725 | 0.372146 | 2.158537 | C1 |
| GSE58294_GSM1406059_IS | 0.809038 | 0.364015 | -1.06488 | 2.773786 | -0.04993 | 3.662197 | C2 |
| GSE58294_GSM1406060_IS | 1.757234 | -1.03012 | -0.76681 | 2.363905 | 0.01369 | 2.457994 | C1 |
| GSE58294_GSM1406061_IS | 0.715913 | -1.01548 | -0.72467 | 2.397367 | -0.30886 | 0.793867 | C1 |
| GSE58294_GSM1406062_IS | 1.93399 | -0.29236 | -0.68805 | 1.586982 | -0.43774 | 2.575762 | C1 |
| GSE58294_GSM1406063_IS | 1.774171 | 0.396802 | 0.356256 | 2.353885 | 0.168368 | 2.066435 | C2 |
| GSE58294_GSM1406064_IS | 1.98104 | 0.001199 | -0.17218 | 2.372463 | 0.145111 | 3.243242 | C2 |
| GSE58294_GSM1406065_IS | 1.471953 | 0.152605 | -0.87169 | 1.627601 | 0.079788 | 1.917143 | C1 |
| GSE58294_GSM1406066_IS | 1.523587 | 0.97771 | -1.57249 | 1.889431 | -0.40001 | 2.150967 | C2 |
| GSE58294_GSM1406067_IS | 1.730779 | -0.57158 | -1.04371 | 2.186166 | 1.043622 | 1.808994 | C1 |
| GSE58294_GSM1406068_IS | 1.36133 | -0.16384 | -0.83672 | 1.370481 | 0.059149 | 1.841045 | C1 |
| GSE58294_GSM1406069_IS | 1.688259 | 0.55406 | -0.02953 | 2.355588 | 0.186842 | 2.495953 | C2 |
| GSE58294_GSM1406070_IS | 1.267341 | -0.60123 | -1.24073 | 2.208064 | 0.294408 | 1.258163 | C1 |
| GSE58294_GSM1406071_IS | 0.918581 | -0.87199 | -0.68767 | 1.735772 | 0.512764 | 0.794917 | C1 |
| GSE58294_GSM1406072_IS | 1.49825 | -0.328 | -1.0965 | 1.743898 | 0.30062 | 2.089133 | C1 |
| GSE58294_GSM1406073_IS | 1.395494 | -1.10261 | -0.13046 | 1.714221 | -0.1925 | 2.400659 | C1 |
| GSE58294_GSM1406074_IS | 1.013535 | -0.83288 | -1.09957 | 2.348765 | 0.194653 | 1.935379 | C1 |
| GSE58294_GSM1406075_IS | 1.309453 | 0.053847 | -0.49409 | 2.547484 | -0.40732 | 3.208897 | C2 |
| GSE58294_GSM1406076_IS | 1.438773 | 0.454079 | -0.68723 | 2.057817 | -0.25565 | 2.738523 | C2 |
| GSE58294_GSM1406077_IS | 0.777687 | -2.74186 | -1.27288 | 1.509087 | 0.043322 | 0.168838 | C1 |
| GSE58294_GSM1406078_IS | 1.232617 | -0.03566 | -1.27837 | 2.142479 | 0.275455 | 2.413947 | C1 |
| GSE58294_GSM1406079_IS | 1.313879 | 0.139595 | -0.88009 | 1.821707 | -0.35724 | 2.106697 | C1 |
| GSE58294_GSM1406080_IS | 2.157495 | 2.354621 | -0.85414 | 2.209536 | 1.467696 | 2.44894 | C2 |
| GSE58294_GSM1406081_IS | 1.93075 | -0.40533 | -0.54655 | 1.964035 | 0.222706 | 2.938796 | C2 |
| GSE58294_GSM1406082_IS | 1.693488 | 0.276462 | -0.91445 | 2.000304 | 0.678168 | 3.253658 | C2 |
| GSE58294_GSM1406083_IS | 1.435586 | -0.56251 | -0.8102 | 1.442177 | -0.12547 | 2.045254 | C1 |
| GSE58294_GSM1406084_IS | 1.792397 | 1.309644 | -0.20682 | 2.571126 | -0.2629 | 3.5198 | C2 |
| GSE58294_GSM1406085_IS | 1.286626 | 1.582783 | -0.27147 | 2.903183 | 0.557827 | 2.872938 | C2 |
| GSE58294_GSM1406086_IS | 1.522336 | 0.638558 | -0.53556 | 2.198597 | -0.29402 | 2.159935 | C2 |
| GSE58294_GSM1406087_IS | 0.940419 | -0.59261 | -0.18109 | 1.598734 | 0.205896 | 0.584571 | C1 |
| GSE58294_GSM1406088_IS | 1.716523 | -1.43836 | 0.067896 | 2.116553 | -0.13115 | 1.61865 | C1 |
| GSE58294_GSM1406089_IS | 1.112776 | -0.95879 | -0.75983 | 1.802073 | -0.35878 | 1.365938 | C1 |
| GSE58294_GSM1406090_IS | 1.734898 | 0.049525 | -0.71477 | 1.785041 | -0.3411 | 2.733903 | C2 |
| GSE58294_GSM1406091_IS | 2.157495 | -0.02605 | -0.75226 | 2.040559 | 0.168995 | 3.32025 | C2 |
| GSE58294_GSM1406092_IS | 1.403851 | -1.57228 | -0.18109 | 1.702621 | -0.08353 | 1.985479 | C1 |
| GSE58294_GSM1406093_IS | 1.546253 | -0.40823 | -0.60638 | 2.427329 | 0.089767 | 2.361686 | C1 |
| GSE58294_GSM1406094_IS | 1.711174 | 1.056154 | -0.15474 | 2.757281 | 0.052021 | 3.392652 | C2 |
| GSE58294_GSM1406095_IS | 1.707219 | 0.849005 | -0.46195 | 2.388178 | 0.52627 | 2.737422 | C2 |
| GSE58294_GSM1406096_IS | 1.870689 | 1.027975 | 0.510997 | 2.436527 | -0.31397 | 2.570552 | C2 |
| GSE58294_GSM1406097_IS | 1.724955 | -0.27681 | -0.42222 | 2.801415 | 0.033661 | 2.931266 | C2 |
| GSE58294_GSM1406098_IS | 1.451112 | 0.594271 | -0.3208 | 2.161011 | 0.299825 | 2.877489 | C2 |
| GSE58294_GSM1406099_IS | 2.067472 | 1.24201 | -0.36072 | 2.485075 | 0.239751 | 3.475055 | C2 |
| GSE58294_GSM1406100_IS | 1.581802 | -0.6115 | -1.25027 | 1.53146 | 1.020961 | 2.513088 | C1 |
| GSE58294_GSM1406101_IS | 1.453536 | 0.541498 | -1.64617 | 1.67345 | 0.074421 | 0.777504 | C1 |
| GSE58294_GSM1406102_IS | 1.38723 | -0.9405 | -0.42869 | 1.632061 | 0.152137 | 1.042494 | C1 |
| GSE58294_GSM1406103_IS | 1.81284 | -1.0933 | -0.94144 | 2.065559 | 0.411574 | 0.438218 | C1 |
| GSE58294_GSM1406104_IS | 1.304289 | -0.07608 | -0.87252 | 1.599839 | 0.086253 | 1.801586 | C1 |
| GSE58294_GSM1406105_IS | 1.27775 | 0.066992 | -0.97671 | 1.161855 | 1.255781 | 0.998151 | C1 |
| GSE58294_GSM1406106_IS | 2.086416 | 1.905476 | -0.84374 | 2.815763 | 0.491572 | 2.439817 | C2 |
| GSE58294_GSM1406107_IS | 1.939787 | 0.497999 | -0.97074 | 2.326038 | 0.603991 | 2.682272 | C2 |
| GSE58294_GSM1406108_IS | 1.826728 | -0.37972 | -0.81375 | 1.434995 | 0.187954 | 1.899836 | C1 |
| GSE58294_GSM1406109_IS | 2.05371 | 0.684695 | -0.41596 | 2.307692 | -0.03821 | 2.685166 | C2 |
| GSE58294_GSM1406110_IS | 1.022483 | -1.10908 | -0.92228 | 1.457614 | 0.358356 | 0.226668 | C1 |
| GSE58294_GSM1406111_IS | 1.657263 | -0.61516 | -0.63458 | 1.613766 | 0.932443 | 2.351864 | C1 |
| GSE58294_GSM1406112_IS | 1.484716 | -1.0686 | -0.60124 | 1.799256 | 0.195002 | 1.384859 | C1 |
| GSE58294_GSM1406113_IS | 1.689087 | -1.08112 | -0.68855 | 2.013896 | 0.514936 | 1.736628 | C1 |
| GSE58294_GSM1406114_IS | 1.603868 | 0.090904 | -0.26083 | 2.507586 | 0.079458 | 0.687908 | C1 |
| GSE58294_GSM1406115_IS | 2.046257 | 0.23512 | -0.71301 | 1.842785 | -0.28335 | 2.723127 | C2 |
| GSE58294_GSM1406116_IS | 2.140044 | 0.231619 | -0.55193 | 1.808504 | 0.123454 | 1.7061 | C1 |
| GSE58294_GSM1406117_IS | 1.499101 | -1.08576 | -0.74175 | 2.050349 | -0.14768 | 2.239873 | C1 |
| GSE58294_GSM1406118_IS | 2.21613 | 1.468291 | -0.09093 | 2.306026 | 0.753598 | 0.99002 | C2 |
| GSE58294_GSM1406119_IS | 2.020803 | 0.410021 | 0.176655 | 2.289634 | -0.11028 | 2.01906 | C2 |
| GSE58294_GSM1406120_IS | 2.243228 | -0.50712 | -0.55484 | 1.964035 | 0.103078 | 3.574886 | C2 |
| GSE58294_GSM1406121_IS | 1.294603 | -0.31923 | -0.56049 | 1.900149 | 0.570412 | 2.265718 | C1 |
| GSE58294_GSM1406122_IS | 1.982269 | 0.863879 | -0.42272 | 2.054874 | -0.16815 | 2.646228 | C2 |
| GSE58294_GSM1406123_IS | 1.256728 | -0.75785 | -1.16223 | 1.160236 | 0.180087 | 0.821043 | C1 |
| GSE58294_GSM1406124_IS | 1.077406 | -0.33767 | -1.30569 | 1.443964 | 0.29653 | -0.48027 | C1 |

## Supplementary Table 5. Drug enrichment analysis of key genes based on small-molecule compound associations.

| Description | RichFactor | FoldEnrichment | zScore | pvalue | p.adjust | qvalue | geneID | Count |
| --- | --- | --- | --- | --- | --- | --- | --- | --- |
| Rosuvastatin | 0.041667 | 136.4375 | 20.12265 | 9.36E-07 | 0.000585 | 7.69E-05 | *KCNJ15/ABCA1/MMP9* | 3 |
| L-proline | 0.016216 | 53.1 | 12.44402 | 1.61E-05 | 0.002405 | 0.000316 | *ARG1/ABCA1/MMP9* | 3 |
| DIOSGENIN | 0.095238 | 311.8571 | 24.91068 | 1.63E-05 | 0.002405 | 0.000316 | *ABCA1/MMP9* | 2 |
| probucol | 0.090909 | 297.6818 | 24.33483 | 1.79E-05 | 0.002405 | 0.000316 | *ABCA1/MMP9* | 2 |
| Adenosine triphosphate | 0.015152 | 49.61364 | 12.01636 | 1.97E-05 | 0.002405 | 0.000316 | *KCNJ15/ABCA1/MMP9* | 3 |
| nitric oxide | 0.011194 | 36.65485 | 10.27191 | 4.87E-05 | 0.002405 | 0.000316 | *ARG1/ABCA1/MMP9* | 3 |
| AZOXYMETHANE | 0.055556 | 181.9167 | 18.98938 | 4.87E-05 | 0.002405 | 0.000316 | *ABCA1/MMP9* | 2 |
| MALEIC HYDRAZIDE | 0.052632 | 172.3421 | 18.47817 | 5.44E-05 | 0.002405 | 0.000316 | *ABCA1/MMP9* | 2 |
| Dinoprostone | 0.010638 | 34.83511 | 10.00263 | 5.67E-05 | 0.002405 | 0.000316 | *ABCA1/ANXA1/MMP9* | 3 |
| dicumarol | 0.051282 | 167.9231 | 18.2374 | 5.73E-05 | 0.002405 | 0.000316 | *ABCA1/MMP9* | 2 |
| Fasudil hydrochloride | 0.051282 | 167.9231 | 18.2374 | 5.73E-05 | 0.002405 | 0.000316 | *ABCA1/MMP9* | 2 |
| Glycitein | 0.05 | 163.725 | 18.00568 | 6.03E-05 | 0.002405 | 0.000316 | *ABCA1/MMP9* | 2 |
| PRAVASTATIN SODIUM | 0.04878 | 159.7317 | 17.78247 | 6.34E-05 | 0.002405 | 0.000316 | *ABCA1/MMP9* | 2 |
| cytochalasin D | 0.047619 | 155.9286 | 17.56724 | 6.66E-05 | 0.002405 | 0.000316 | *ABCA1/MMP9* | 2 |
| edaravone | 0.047619 | 155.9286 | 17.56724 | 6.66E-05 | 0.002405 | 0.000316 | *ABCA1/MMP9* | 2 |
| N-Formyl-Met-Leu-Phe | 0.047619 | 155.9286 | 17.56724 | 6.66E-05 | 0.002405 | 0.000316 | *ABCA1/MMP9* | 2 |
| 9,12-Octadecadienoic acid | 0.046512 | 152.3023 | 17.35955 | 6.98E-05 | 0.002405 | 0.000316 | *ABCA1/MMP9* | 2 |
| Geranylgeranyl pyrophosphate | 0.045455 | 148.8409 | 17.15895 | 7.31E-05 | 0.002405 | 0.000316 | *ABCA1/MMP9* | 2 |
| mevalonic acid | 0.045455 | 148.8409 | 17.15895 | 7.31E-05 | 0.002405 | 0.000316 | *ABCA1/MMP9* | 2 |
| alpha-Neu5Ac | 0.042553 | 139.3404 | 16.5959 | 8.35E-05 | 0.00258 | 0.000339 | *ABCA1/MMP9* | 2 |
| candesartan | 0.041667 | 136.4375 | 16.42001 | 8.71E-05 | 0.00258 | 0.000339 | *ABCA1/MMP9* | 2 |
| Platelet activating factor | 0.040816 | 133.6531 | 16.24951 | 9.08E-05 | 0.00258 | 0.000339 | *ABCA1/MMP9* | 2 |
| (+)-MK-801 hydrogen maleate | 0.037736 | 123.566 | 15.61627 | 0.000106 | 0.002792 | 0.000367 | *ABCA1/MMP9* | 2 |
| Chalcone | 0.036364 | 119.0727 | 15.32578 | 0.000115 | 0.002792 | 0.000367 | *ABCA1/MMP9* | 2 |
| Methyl viologen | 0.035714 | 116.9464 | 15.18637 | 0.000119 | 0.002792 | 0.000367 | *ABCA1/MMP9* | 2 |
| Sildenafil citrate | 0.035088 | 114.8947 | 15.05063 | 0.000123 | 0.002792 | 0.000367 | *ABCA1/MMP9* | 2 |
| GW9662 | 0.033898 | 111 | 14.78954 | 0.000132 | 0.002792 | 0.000367 | *ABCA1/MMP9* | 2 |
| (-)-isoprenaline | 0.007853 | 25.71597 | 8.526204 | 0.00014 | 0.002792 | 0.000367 | *ABCA1/ANXA1/MMP9* | 3 |
| DL-Methamphetamine | 0.032258 | 105.629 | 14.42172 | 0.000146 | 0.002792 | 0.000367 | *ABCA1/MMP9* | 2 |
| artemisinin | 0.031746 | 103.9524 | 14.30497 | 0.000151 | 0.002792 | 0.000367 | *ABCA1/MMP9* | 2 |

# Supplementary Figures

## Supplementary Figure 1.


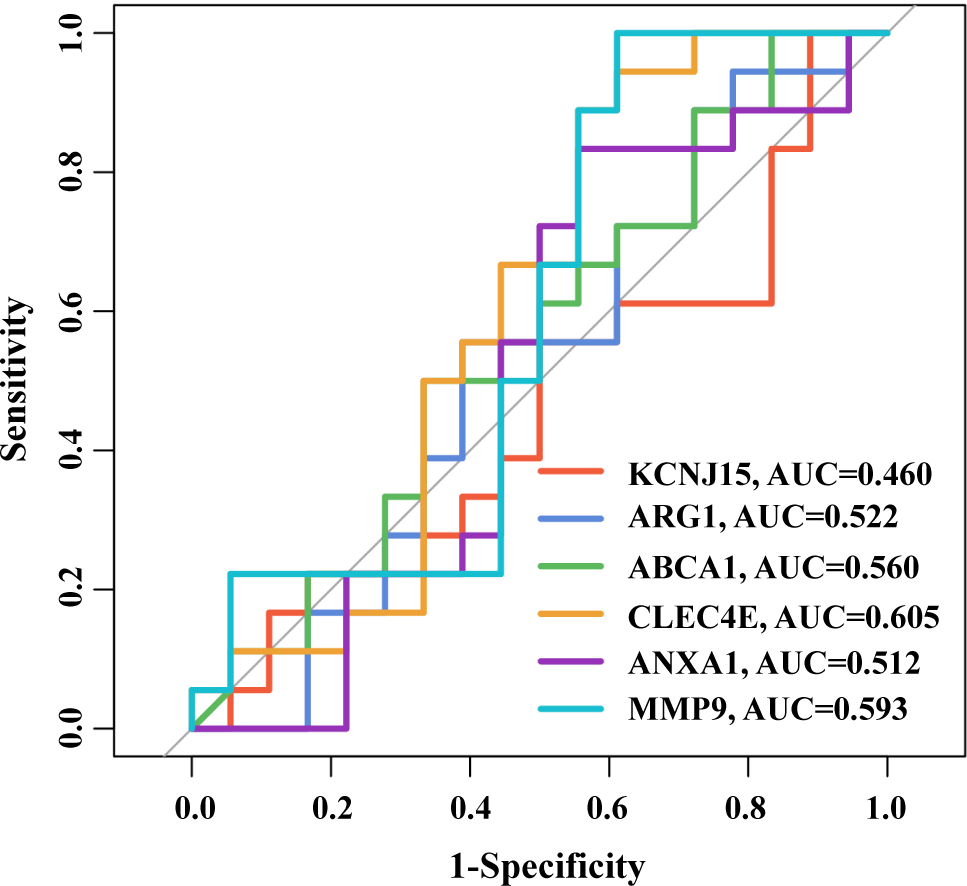


**Supplementary Figure 1.** ROC curves illustrating the diagnostic performance of each intersecting feature gene in the test dataset.

## Supplementary Figure 2.


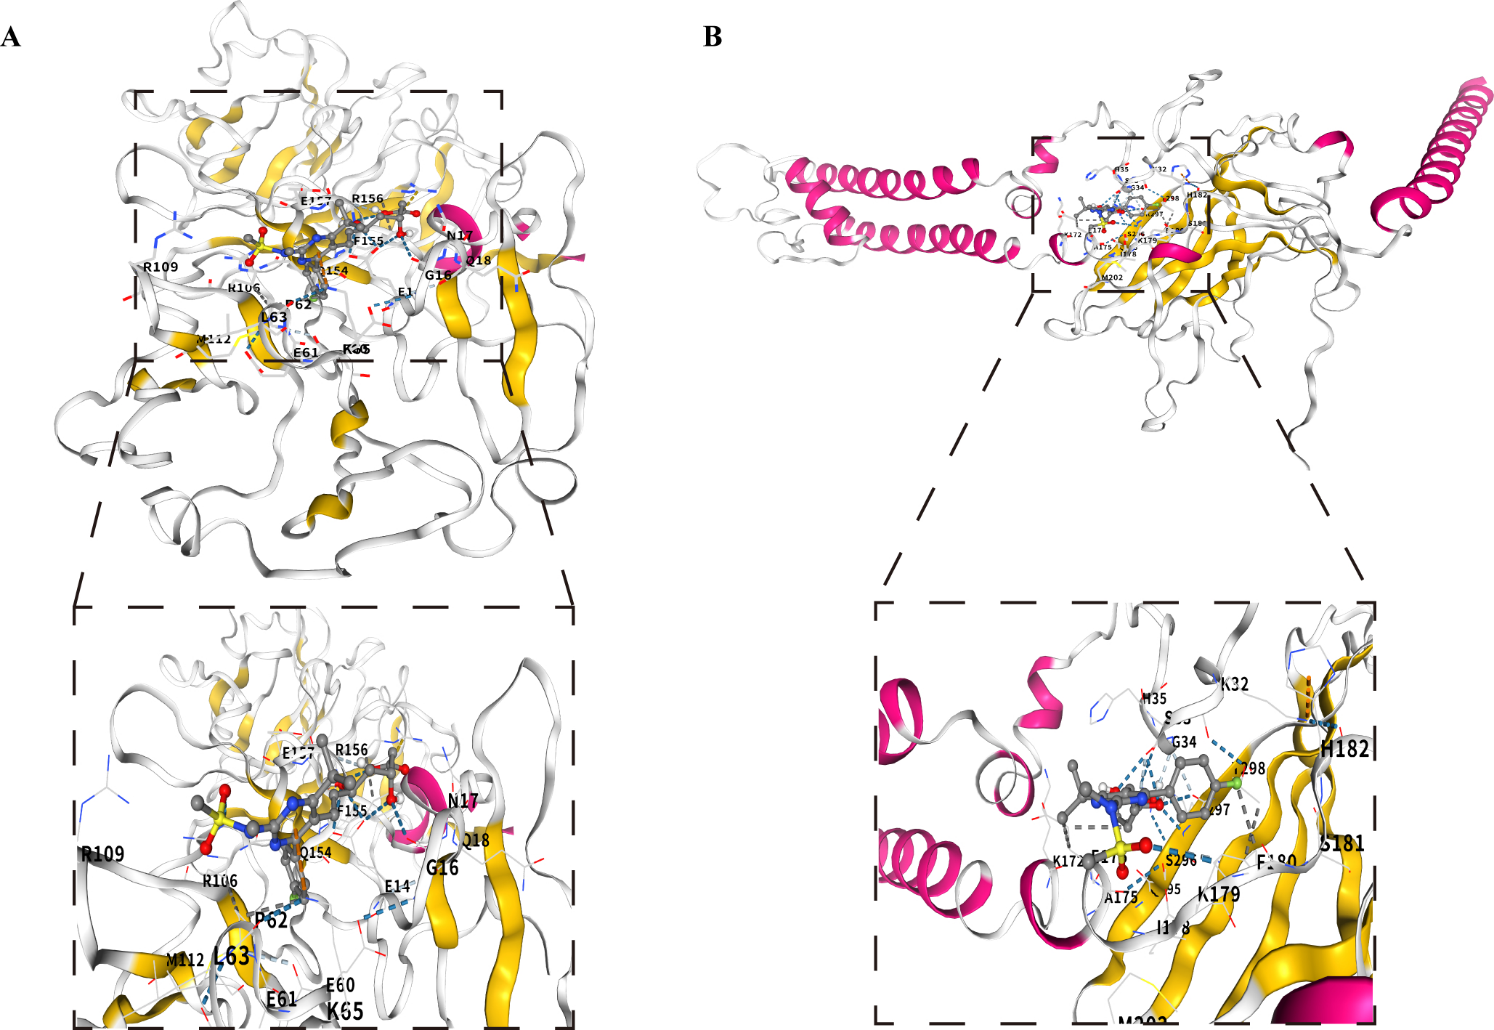


**Supplementary Figure 2.** Molecular docking model showing the predicted interaction between Rosuvastatin and its target protein **(A)** MMP9 and **(B)** KCNJ15.

1. Wang Y, Liang S, Hong Q, Mu J, Wu Y, Li K, et al. Construction of a neutrophil extracellular trap formation-related gene model for predicting the survival of lung adenocarcinoma patients and their response to immunotherapy. Transl Lung Cancer Res. 2024;13(12):3407-25. doi:10.21037/tlcr-24-463

2. Shi H, Pan Y, Xiang G, Wang M, Huang Y, He L, et al. A novel NET-related gene signature for predicting DLBCL prognosis. J Transl Med. 2023;21(1):630. doi:10.1186/s12967-023-04494-9

3. Zhang Y, Guo L, Dai Q, Shang B, Xiao T, Di X, et al. A signature for pan-cancer prognosis based on neutrophil extracellular traps. J Immunother Cancer. 2022;10(6). doi:10.1136/jitc-2021-004210
